# Supplementary material for: Metabolomic Links between Sugar-Sweetened Beverage Intake and Obesity
Source: Hindawi journal article supplement (doi:10.1155/2020/7154738), 2020-05-01
Supplement: f1 [file 7154738.f1.pdf]

[Type here]

### **Metabolomic links between sugar-sweetened beverage intake and obesity**

Bingjie Zhou, Reiko Ichikawa, Laurence D. Parnell, Sabrina E. Noel, Xiyuan Zhang, Shilpa N. Bhupathiraju, Caren E. Smith, Katherine L. Tucker, Jose M. Ordovas, Chao-Qiang Lai

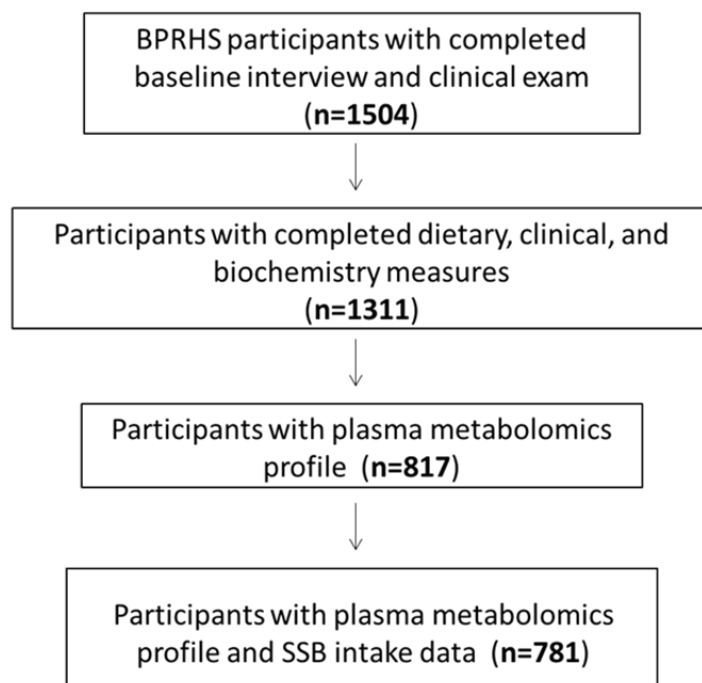

**Supplemental Figure 1.** Flowchart of BPRHS sample for metabolomics analysis

**Table S1. Association analysis of metabolites with BMI and/or SSB intake**

| [Type here] |                               | BMI    |       |          | SSB    |       |          |
|-------------|-------------------------------|--------|-------|----------|--------|-------|----------|
| CompID      | BIOCHEMICAL                   | Beta*  | SE    | P value* | Beta*  | SE    | P value* |
| 54805       | 3beta-hydroxy-5-cholestenoate | -5.559 | 0.666 | 3.15E-16 | -0.003 | 0.018 | 0.86     |
| 48153       | mannose                       | 3.756  | 0.466 | 2.93E-15 | -0.014 | 0.015 | 0.321    |
| 15506       | choline                       | 7.828  | 1.141 | 1.40E-11 | 0.008  | 0.009 | 0.373    |
| 32418       | myristoleate (14:1n5)         | 2.344  | 0.352 | 5.07E-11 | 0.045  | 0.026 | 0.081    |
| 33447       | palmitoleate (16:1n7)         | 2.011  | 0.31  | 1.53E-10 | 0.033  | 0.03  | 0.274    |
| 1604        | urate                         | 4.962  | 0.794 | 6.85E-10 | 0.003  | 0.01  | 0.741    |
| 48258       | 1-oleoyl-GPC (18:1)           | -4.917 | 0.792 | 8.80E-10 | 0.028  | 0.013 | 0.03     |
| 43829       | gamma-glutamylvaline          | 5.626  | 0.935 | 2.80E-09 | 0.005  | 0.016 | 0.732    |
| 44526       | 3-methyl-2-oxobutyrate        | 3.103  | 0.527 | 5.89E-09 | -0.017 | 0.011 | 0.141    |
| 33422       | gamma-glutamylphenylalanine   | 5.604  | 0.96  | 7.92E-09 | 0.012  | 0.013 | 0.354    |
| 33971       | 10-heptadecenoate (17:1n7)    | 2.355  | 0.426 | 4.41E-08 | 0.026  | 0.024 | 0.278    |
| 34419       | 1-linoleoyl-GPC (18:2)        | -4.159 | 0.754 | 4.85E-08 | 0.019  | 0.012 | 0.109    |
| 15685       | 5-hydroxylysine               | 2.001  | 0.368 | 7.01E-08 | 0.047  | 0.023 | 0.041    |
| 59          | histidine                     | -8.330 | 1.555 | 1.13E-07 | 0.007  | 0.007 | 0.306    |
| 512         | asparagine                    | -4.151 | 0.791 | 2.00E-07 | 0.000  | 0.007 | 0.986    |
| 57          | glutamate                     | 8.624  | 1.669 | 3.02E-07 | 0.022  | 0.018 | 0.228    |
| 1417        | kynurenate                    | 2.048  | 0.397 | 3.15E-07 | -0.008 | 0.02  | 0.707    |
| 1299        | tyrosine                      | 3.907  | 0.758 | 3.29E-07 | 0.014  | 0.011 | 0.174    |
| 33961       | 1-stearoyl-GPC (18:0)         | -6.249 | 1.236 | 5.35E-07 | 0.013  | 0.011 | 0.233    |
| 33955       | 1-palmitoyl-GPC (16:0)        | -7.337 | 1.473 | 7.84E-07 | 0.020  | 0.009 | 0.03     |
| 58          | glycine                       | -4.062 | 0.825 | 1.04E-06 | 0.025  | 0.013 | 0.047    |
| 34407       | isovalerylcarnitine (C5)      | 1.936  | 0.412 | 3.14E-06 | -0.020 | 0.019 | 0.274    |
| 52285       | oleate/vaccenate (18:1)       | 2.532  | 0.54  | 3.21E-06 | -0.005 | 0.023 | 0.825    |
| 64          | phenylalanine                 | 7.470  | 1.595 | 3.33E-06 | 0.001  | 0.006 | 0.9      |

[Type here]

|       |                                                              |        |       |          |        |       |         |
|-------|--------------------------------------------------------------|--------|-------|----------|--------|-------|---------|
| 35136 | 5-methyluridine (ribothymidine)                              | -4.663 | 1.038 | 8.07E-06 | -0.008 | 0.009 | 0.407   |
| 52603 | 1,2-dilinoleoyl-GPC (18:2/18:2)<br>lignoceroyl sphingomyelin | -2.976 | 0.666 | 9.14E-06 | 0.039  | 0.016 | 0.014   |
| 57330 | (d18:1/24:0)                                                 | -2.243 | 0.504 | 9.65E-06 | -0.003 | 0.018 | 0.85    |
| 15749 | 3-phenylpropionate<br>(hydrocinnamate)                       | -0.699 | 0.157 | 9.97E-06 | -0.143 | 0.061 | 0.018   |
| 1365  | myristate (14:0)                                             | 2.483  | 0.562 | 1.15E-05 | 0.014  | 0.019 | 0.466   |
| 1561  | alpha-tocopherol<br>linolenate [alpha or gamma;              | -2.130 | 0.495 | 1.93E-05 | 0.016  | 0.026 | 0.542   |
| 34035 | (18:3n3 or 6)]                                               | 2.185  | 0.513 | 2.35E-05 | -0.015 | 0.028 | 0.576   |
| 33972 | 10-nonadecenoate (19:1n9)                                    | 1.904  | 0.454 | 3.11E-05 | 0.012  | 0.024 | 0.605   |
| 1336  | palmitate (16:0)                                             | 3.527  | 0.843 | 3.20E-05 | -0.002 | 0.016 | 0.893   |
| 1105  | linoleate (18:2n6)                                           | 2.597  | 0.653 | 7.71E-05 | -0.006 | 0.023 | 0.788   |
| 40499 | 4-hydroxyglutamate                                           | 0.979  | 0.25  | 0.000101 | 0.060  | 0.043 | 0.165   |
| 18369 | gamma-glutamylleucine                                        | 3.127  | 0.802 | 0.000104 | -0.006 | 0.014 | 0.638   |
| 40473 | hydantoin-5-propionic acid                                   | 0.739  | 0.191 | 0.000117 | 0.001  | 0.035 | 0.973   |
| 34409 | stearoylcarnitine (C18)<br>sphingomyelin (d18:2/16:0,        | -2.133 | 0.551 | 0.000118 | 0.020  | 0.017 | 0.248   |
| 42459 | d18:1/16:1)                                                  | 3.326  | 0.865 | 0.000131 | 0.016  | 0.01  | 0.111   |
| 32980 | adrenate (22:4n6)<br>1-linoleoyl-2-linolenoyl-GPC            | 1.516  | 0.399 | 0.000155 | -0.015 | 0.025 | 0.546   |
| 53176 | (18:2/18:3)                                                  | -0.910 | 0.24  | 0.000157 | 0.076  | 0.03  | 0.011   |
| 47120 | 9-hydroxystearate<br>gamma-tocopherol/beta-                  | 1.332  | 0.354 | 0.000184 | 0.077  | 0.027 | 0.00515 |
| 52473 | tocopherol                                                   | 1.566  | 0.418 | 0.000195 | 0.044  | 0.022 | 0.044   |
| 1301  | lysine                                                       | 4.186  | 1.131 | 0.00023  | 0.003  | 0.008 | 0.719   |
| 36600 | 1-linoleoyl-GPE (18:2)                                       | -1.356 | 0.368 | 0.000244 | 0.061  | 0.019 | 0.00121 |
| 38661 | hydroxycotinine<br>1-(1-enyl-palmitoyl)-2-oleoyl-            | -0.773 | 0.21  | 0.000253 | -0.042 | 0.042 | 0.325   |
| 52478 | GPC (P-16:0/18:1)                                            | -3.578 | 0.979 | 0.000274 | 0.007  | 0.014 | 0.619   |

[Type here]

|       |                                                 |        |       |          |        |       |         |
|-------|-------------------------------------------------|--------|-------|----------|--------|-------|---------|
| 37506 | palmitoyl sphingomyelin<br>(d18:1/16:0)         | -5.266 | 1.443 | 0.00028  | 0.001  | 0.007 | 0.92    |
| 17805 | dihomo-linoleate (20:2n6)                       | 1.817  | 0.504 | 0.00033  | -0.009 | 0.023 | 0.705   |
| 40008 | isoleucylglycine                                | -7.685 | 2.132 | 0.000333 | 0.053  | 0.029 | 0.067   |
| 1589  | N-acetylmethionine                              | 2.010  | 0.559 | 0.000346 | 0.004  | 0.015 | 0.776   |
| 37058 | succinylcarnitine (C4-DC)                       | 1.996  | 0.556 | 0.000355 | 0.027  | 0.016 | 0.094   |
| 52710 | 1-linoleoyl-2-arachidonoyl-GPC<br>(18:2/20:4n6) | -1.913 | 0.536 | 0.000381 | 0.006  | 0.015 | 0.685   |
| 48351 | N1-methylinosine                                | 1.906  | 0.535 | 0.000393 | 0.027  | 0.016 | 0.103   |
| 36602 | 1-oleoyl-GPI (18:1)                             | -1.205 | 0.339 | 0.000393 | 0.053  | 0.025 | 0.033   |
| 36103 | p-cresol sulfate                                | -0.666 | 0.192 | 0.00054  | -0.012 | 0.046 | 0.801   |
| 15720 | N-acetylglutamate                               | 1.906  | 0.569 | 0.000856 | 0.022  | 0.033 | 0.498   |
| 55015 | gamma-glutamyl-alpha-lysine                     | 1.898  | 0.57  | 0.000921 | 0.008  | 0.013 | 0.54    |
| 35628 | 1-oleoyl-GPE (18:1)                             | -1.216 | 0.366 | 0.000942 | 0.049  | 0.021 | 0.02    |
| 52616 | 1-palmitoyl-2-stearoyl-GPC<br>(16:0/18:0)       | -2.571 | 0.783 | 0.00108  | 0.036  | 0.012 | 0.00228 |
| 52281 | 2-hydroxybutyrate/2-<br>hydroxyisobutyrate      | 1.222  | 0.376 | 0.00121  | -0.068 | 0.024 | 0.00443 |
| 528   | alpha-ketoglutarate                             | 6.231  | 1.922 | 0.00124  | 0.066  | 0.029 | 0.021   |
| 53242 | 5-bromotryptophan                               | -1.580 | 0.493 | 0.00142  | 0.029  | 0.018 | 0.105   |
| 33968 | 5-dodecenoate (12:1n7)                          | 1.167  | 0.367 | 0.00154  | 0.021  | 0.025 | 0.408   |
| 443   | aspartate                                       | 10.676 | 3.372 | 0.00161  | -0.002 | 0.014 | 0.856   |
| 38754 | gamma-carboxyglutamate                          | 1.898  | 0.61  | 0.00193  | 0.005  | 0.015 | 0.737   |
| 32506 | 2-linoleoylglycerol (18:2)                      | -0.550 | 0.179 | 0.00215  | 0.024  | 0.036 | 0.502   |
| 27665 | 1-methylnicotinamide                            | -1.219 | 0.396 | 0.00219  | -0.040 | 0.022 | 0.073   |
| 33946 | N-acetylhistidine                               | -1.176 | 0.385 | 0.00232  | 0.084  | 0.027 | 0.00193 |
| 35157 | N6-carbamoylthreonyladenosine                   | 1.519  | 0.498 | 0.00235  | 0.024  | 0.015 | 0.124   |
| 27731 | ribonate                                        | 1.228  | 0.412 | 0.00294  | 0.027  | 0.02  | 0.164   |
| 33969 | stearidonate (18:4n3)                           | 1.708  | 0.575 | 0.00309  | -0.011 | 0.029 | 0.704   |
| 42398 | 1-stearoyl-GPE (18:0)                           | -1.876 | 0.633 | 0.00314  | 0.020  | 0.017 | 0.249   |

[Type here]

|       |                                                              |         |        |         |        |       |         |
|-------|--------------------------------------------------------------|---------|--------|---------|--------|-------|---------|
| 1898  | proline                                                      | 3.019   | 1.045  | 0.00396 | 0.002  | 0.009 | 0.866   |
| 52988 | adipoylcarnitine (C6-DC)                                     | 0.655   | 0.228  | 0.00411 | 0.000  | 0.025 | 0.986   |
| 43582 | 5-(galactosylhydroxy)-L-lysine<br>sphingomyelin (d18:1/18:1, | 0.934   | 0.326  | 0.00432 | 0.087  | 0.054 | 0.104   |
| 37529 | d18:2/18:0)                                                  | 2.134   | 0.747  | 0.00437 | -0.017 | 0.011 | 0.131   |
| 41220 | 2-stearoyl-GPE (18:0)<br>1-(1-enyl-palmitoyl)-GPC (P-        | -1.785  | 0.626  | 0.0045  | 0.025  | 0.021 | 0.234   |
| 52474 | 16:0)                                                        | -3.079  | 1.088  | 0.00476 | 0.022  | 0.02  | 0.273   |
| 36098 | 4-vinylphenol sulfate                                        | -0.689  | 0.243  | 0.00478 | -0.017 | 0.047 | 0.723   |
| 37752 | 13-HODE + 9-HODE                                             | 106.517 | 37.656 | 0.0048  | 0.050  | 0.027 | 0.067   |
| 52435 | sphingomyelin (d18:2/23:0,<br>d18:1/23:1, d17:1/24:1)        | -1.008  | 0.359  | 0.00515 | -0.007 | 0.02  | 0.724   |
| 33587 | eicosenoate (20:1)                                           | 1.341   | 0.479  | 0.00529 | -0.019 | 0.025 | 0.446   |
| 553   | cotinine                                                     | -1.189  | 0.425  | 0.00531 | -0.011 | 0.074 | 0.887   |
| 1118  | arachidate (20:0)                                            | -3.755  | 1.346  | 0.00539 | 0.015  | 0.01  | 0.133   |
| 54923 | beta-citrylglutamate                                         | 1.253   | 0.452  | 0.00569 | -0.007 | 0.016 | 0.654   |
| 32412 | butyrylcarnitine (C4)                                        | 0.369   | 0.134  | 0.00583 | 0.051  | 0.023 | 0.025   |
| 63    | cholesterol                                                  | -1.103  | 0.4    | 0.00597 | 0.030  | 0.014 | 0.039   |
| 47153 | sphingomyelin (d18:1/24:1,<br>d18:2/24:0)                    | -1.605  | 0.585  | 0.0062  | 0.024  | 0.013 | 0.079   |
| 1868  | cysteine                                                     | 0.561   | 0.205  | 0.0063  | 0.011  | 0.013 | 0.382   |
| 48492 | behenoyl sphingomyelin<br>(d18:1/22:0)                       | -1.840  | 0.681  | 0.00703 | -0.003 | 0.013 | 0.81    |
| 43264 | 3-hydroxybutyrylcarnitine (1)                                | 0.629   | 0.234  | 0.00727 | -0.138 | 0.049 | 0.00492 |
| 42382 | S-adenosylhomocysteine (SAH)                                 | 2.527   | 0.942  | 0.00747 | 0.035  | 0.022 | 0.119   |
| 48429 | methyl-4-hydroxybenzoate sulfate<br>1-palmitoyl-2-oleoyl-GPE | -0.189  | 0.071  | 0.00784 | 0.174  | 0.08  | 0.03    |
| 19263 | (16:0/18:1)                                                  | 0.474   | 0.178  | 0.00805 | 0.032  | 0.028 | 0.243   |
| 36738 | gamma-glutamylglutamate<br>tricosanoyl sphingomyelin         | 1.986   | 0.748  | 0.00808 | 0.018  | 0.022 | 0.411   |
| 52436 | (d18:1/23:0)                                                 | -0.998  | 0.384  | 0.01    | -0.018 | 0.017 | 0.297   |

[Type here]

|       |                                                           |        |       |       |        |       |          |
|-------|-----------------------------------------------------------|--------|-------|-------|--------|-------|----------|
| 36845 | o-cresol sulfate                                          | -0.716 | 0.277 | 0.01  | -0.026 | 0.055 | 0.639    |
| 60    | leucine                                                   | 2.577  | 1.037 | 0.013 | -0.008 | 0.008 | 0.361    |
| 1591  | N-acetylvaline                                            | 1.974  | 0.794 | 0.013 | 0.008  | 0.011 | 0.444    |
| 1638  | arginine                                                  | -3.401 | 1.373 | 0.013 | 0.009  | 0.01  | 0.356    |
| 2132  | citrulline                                                | -2.138 | 0.864 | 0.014 | -0.001 | 0.011 | 0.949    |
| 37097 | tryptophan betaine                                        | -0.484 | 0.197 | 0.014 | -0.064 | 0.063 | 0.305    |
| 39600 | 3-hydroxyhippurate                                        | 0.108  | 0.044 | 0.015 | -0.001 | 0.063 | 0.984    |
| 52452 | 1-stearoyl-2-linoleoyl-GPC<br>(18:0/18:2)                 | -2.975 | 1.218 | 0.015 | 0.016  | 0.008 | 0.033    |
| 43231 | 6-oxopiperidine-2-carboxylate                             | 1.061  | 0.436 | 0.015 | 0.013  | 0.021 | 0.522    |
| 18477 | glycodeoxycholate                                         | -0.547 | 0.225 | 0.015 | 0.046  | 0.116 | 0.689    |
| 33230 | 1-palmitoleoyl-GPC (16:1)                                 | -0.893 | 0.367 | 0.015 | 0.071  | 0.017 | 4.27E-05 |
| 35631 | 1-palmitoyl-GPE (16:0)                                    | -1.265 | 0.526 | 0.016 | 0.028  | 0.018 | 0.115    |
| 52975 | glycodeoxycholate sulfate                                 | -0.627 | 0.265 | 0.018 | 0.020  | 0.056 | 0.727    |
| 47154 | sphingomyelin (d18:2/14:0,<br>d18:1/14:1)                 | 0.706  | 0.299 | 0.018 | 0.048  | 0.018 | 0.00881  |
| 52673 | 1-(1-enyl-palmitoyl)-2-<br>arachidonoyl-GPE (P-16:0/20:4) | 1.112  | 0.47  | 0.018 | -0.014 | 0.019 | 0.455    |
| 37431 | N-methylproline                                           | 0.331  | 0.141 | 0.019 | 0.057  | 0.065 | 0.386    |
| 52464 | 1-palmitoyl-2-arachidonoyl-GPE<br>(16:0/20:4)             | 0.684  | 0.293 | 0.02  | 0.002  | 0.022 | 0.911    |
| 6146  | 2-aminoadipate                                            | 0.762  | 0.327 | 0.02  | 0.002  | 0.033 | 0.951    |
| 32197 | 3-(4-hydroxyphenyl)lactate                                | 1.241  | 0.534 | 0.021 | 0.022  | 0.015 | 0.15     |
| 34389 | 1-methylxanthine                                          | -0.245 | 0.106 | 0.021 | 0.041  | 0.053 | 0.44     |
| 1549  | 3-hydroxyisobutyrate                                      | 0.882  | 0.389 | 0.024 | -0.044 | 0.021 | 0.036    |
| 35186 | 1-arachidonoyl-GPE (20:4n6)                               | -1.263 | 0.557 | 0.024 | 0.015  | 0.014 | 0.278    |
| 52984 | 3-hydroxybutyrylcarnitine (2)                             | 0.783  | 0.348 | 0.025 | -0.063 | 0.026 | 0.014    |
| 1494  | 5-oxoproline                                              | -6.076 | 2.701 | 0.025 | 0.001  | 0.01  | 0.94     |
| 37482 | 17alpha-hydroxypregnenolone 3-<br>sulfate                 | -0.660 | 0.295 | 0.026 | -0.021 | 0.043 | 0.631    |

[Type here]

|       |                                                       |        |       |       |        |       |       |
|-------|-------------------------------------------------------|--------|-------|-------|--------|-------|-------|
| 15677 | 3-methylhistidine                                     | 0.293  | 0.131 | 0.026 | -0.049 | 0.052 | 0.344 |
| 1648  | serine                                                | -2.852 | 1.283 | 0.027 | -0.001 | 0.01  | 0.909 |
| 15443 | glucuronate                                           | 0.952  | 0.428 | 0.027 | 0.042  | 0.032 | 0.193 |
| 17945 | 2-hydroxystearate                                     | -2.398 | 1.087 | 0.028 | 0.000  | 0.011 | 0.97  |
| 42574 | glycohyocholate                                       | -0.273 | 0.126 | 0.03  | 0.053  | 0.054 | 0.334 |
| 33228 | 1-arachidonoyl-GPC (20:4n6)                           | -1.086 | 0.503 | 0.031 | -0.006 | 0.017 | 0.716 |
| 39271 | 1-(1-enyl-stearoyl)-GPE (P-18:0)                      | -1.751 | 0.815 | 0.032 | -0.005 | 0.023 | 0.824 |
| 45095 | 2-methylbutyrylcarnitine (C5)                         | 0.846  | 0.394 | 0.032 | -0.021 | 0.03  | 0.495 |
| 52495 | sphingomyelin (d18:1/21:0,<br>d17:1/22:0, d16:1/23:0) | -0.655 | 0.306 | 0.033 | -0.019 | 0.018 | 0.281 |
| 53    | glutamine                                             | -2.039 | 0.952 | 0.033 | 0.004  | 0.007 | 0.524 |
| 396   | glutarate (C5-DC)                                     | 0.893  | 0.42  | 0.034 | 0.041  | 0.05  | 0.42  |
| 32388 | dodecanedioate (C12-DC)                               | -0.647 | 0.304 | 0.034 | 0.036  | 0.025 | 0.146 |
| 32504 | docosapentaenoate (n3 DPA;<br>22:5n3)                 | 1.024  | 0.485 | 0.035 | -0.029 | 0.024 | 0.228 |
| 1493  | ornithine                                             | 1.777  | 0.845 | 0.036 | 0.014  | 0.012 | 0.246 |
| 12261 | taurodeoxycholate                                     | -0.181 | 0.086 | 0.036 | 0.035  | 0.078 | 0.656 |
| 48490 | sphingomyelin (d18:1/20:0,<br>d16:1/22:0)             | -1.620 | 0.772 | 0.036 | -0.028 | 0.011 | 0.011 |
| 20675 | 1,5-anhydroglucitol (1,5-AG)                          | -1.086 | 0.521 | 0.037 | 0.090  | 0.04  | 0.024 |
| 1125  | isoleucine                                            | 2.163  | 1.043 | 0.038 | -0.008 | 0.009 | 0.36  |
| 42449 | 1-palmitoyl-2-linoleoyl-GPE<br>(16:0/18:2)            | 0.444  | 0.216 | 0.04  | 0.039  | 0.026 | 0.135 |
| 53223 | palmitoleoylcarnitine (C16:1)                         | 0.573  | 0.279 | 0.041 | 0.028  | 0.022 | 0.215 |
| 1121  | margarate (17:0)                                      | 1.409  | 0.695 | 0.043 | 0.002  | 0.017 | 0.912 |
| 55017 | 4-hydroxyphenylacetylglutamine                        | 0.168  | 0.083 | 0.044 | 0.071  | 0.047 | 0.134 |
| 42420 | erythronate                                           | 1.684  | 0.838 | 0.045 | 0.026  | 0.012 | 0.033 |
| 36847 | 2-ethylphenylsulfate                                  | -0.671 | 0.334 | 0.045 | -0.061 | 0.032 | 0.055 |
| 35675 | 2-hydroxypalmitate                                    | -2.347 | 1.186 | 0.048 | 0.002  | 0.01  | 0.817 |

[Type here]

|       |                                                       |        |       |       |        |       |          |
|-------|-------------------------------------------------------|--------|-------|-------|--------|-------|----------|
| 52447 | 1-stearoyl-2-arachidonoyl-GPE<br>(18:0/20:4)          | 0.674  | 0.341 | 0.049 | -0.021 | 0.019 | 0.276    |
| 52726 | 1-stearoyl-2-oleoyl-GPI<br>(18:0/18:1)                | -0.450 | 0.23  | 0.051 | 0.111  | 0.034 | 0.000929 |
| 52748 | 1-(1-enyl-stearoyl)-2-linoleoyl-<br>GPE (P-18:0/18:2) | -0.896 | 0.466 | 0.055 | 0.042  | 0.018 | 0.018    |
| 52468 | 1-stearoyl-2-linoleoyl-GPI<br>(18:0/18:2)             | -0.897 | 0.469 | 0.056 | 0.066  | 0.018 | 0.00032  |
| 35305 | 1-palmitoyl-GPI (16:0)                                | -0.663 | 0.349 | 0.058 | 0.105  | 0.027 | 8.02E-05 |
| 45951 | 1-linolenoyl-GPC (18:3)                               | -0.496 | 0.271 | 0.068 | 0.060  | 0.026 | 0.021    |
| 36594 | 1-linoleoyl-GPI (18:2)                                | -0.695 | 0.386 | 0.072 | 0.040  | 0.018 | 0.024    |
| 32346 | glycochenodeoxycholate                                | -0.333 | 0.186 | 0.074 | 0.110  | 0.049 | 0.024    |
| 52461 | 1-palmitoyl-2-oleoyl-GPC<br>(16:0/18:1)               | -1.477 | 0.836 | 0.078 | 0.037  | 0.01  | 0.000311 |
| 52615 | sphingomyelin (d18:1/17:0,<br>d17:1/18:0, d19:1/16:0) | -1.175 | 0.668 | 0.079 | -0.034 | 0.012 | 0.0057   |
| 42374 | 2-aminobutyrate                                       | 0.985  | 0.573 | 0.086 | -0.060 | 0.016 | 0.00014  |
| 53260 | oleoylcholine                                         | -0.043 | 0.025 | 0.089 | 0.155  | 0.056 | 0.00585  |
| 32390 | N-acetyltyrosine                                      | 0.554  | 0.341 | 0.105 | 0.060  | 0.023 | 0.00956  |
| 52449 | 1-stearoyl-2-arachidonoyl-GPI<br>(18:0/20:4)          | -0.846 | 0.538 | 0.116 | 0.033  | 0.015 | 0.024    |
| 33950 | N-acetylphenylalanine                                 | 0.510  | 0.328 | 0.12  | 0.051  | 0.021 | 0.013    |
| 33364 | gamma-glutamylthreonine                               | 1.442  | 0.935 | 0.124 | 0.037  | 0.016 | 0.021    |
| 52438 | 1-stearoyl-2-oleoyl-GPC<br>(18:0/18:1)                | -0.717 | 0.479 | 0.135 | 0.067  | 0.015 | 5.98E-06 |
| 31591 | androsterone sulfate                                  | -0.674 | 0.455 | 0.139 | -0.121 | 0.052 | 0.02     |
| 54967 | palmitoleoyl-linoleoyl-glycerol<br>(16:1/18:2) [1]    | 0.325  | 0.223 | 0.145 | 0.061  | 0.03  | 0.043    |
| 39379 | glycochenodeoxycholate                                | -0.218 | 0.151 | 0.149 | 0.166  | 0.058 | 0.00445  |
| 52944 | palmitoylcholine                                      | -0.052 | 0.037 | 0.162 | 0.118  | 0.045 | 0.0081   |



[Type here]

|       |                                                         |        |       |       |        |       |          |
|-------|---------------------------------------------------------|--------|-------|-------|--------|-------|----------|
| 18494 | taurochenodeoxycholate                                  | -0.060 | 0.045 | 0.183 | 0.137  | 0.061 | 0.025    |
| 52470 | 1-palmitoyl-2-palmitoleoyl-GPC<br>(16:0/16:1)           | 0.282  | 0.223 | 0.206 | 0.098  | 0.023 | 2.37E-05 |
| 42446 | 1-palmitoyl-2-linoleoyl-GPC<br>(16:0/18:2)              | -1.575 | 1.261 | 0.212 | 0.015  | 0.008 | 0.05     |
| 18476 | glycocholate                                            | -0.128 | 0.103 | 0.215 | 0.137  | 0.055 | 0.012    |
| 46115 | 21-hydroxypregnenolone disulfate                        | -0.418 | 0.358 | 0.244 | -0.081 | 0.03  | 0.00762  |
| 19130 | 1,2-dipalmitoyl-GPC (16:0/16:0)                         | -1.128 | 0.969 | 0.245 | 0.037  | 0.01  | 0.000101 |
| 48434 | N-acetylcitrulline                                      | -0.017 | 0.015 | 0.248 | 0.118  | 0.046 | 0.011    |
| 53261 | arachidonoylcholine                                     | -0.034 | 0.029 | 0.251 | 0.096  | 0.047 | 0.043    |
| 48460 | propyl 4-hydroxybenzoate sulfate                        | -0.042 | 0.037 | 0.26  | 0.159  | 0.077 | 0.038    |
| 33973 | epiandrosterone sulfate                                 | -0.707 | 0.641 | 0.27  | -0.163 | 0.052 | 0.00193  |
| 40703 | prolylglycine                                           | -1.052 | 1.035 | 0.31  | 0.088  | 0.043 | 0.04     |
| 15990 | glycerophosphorylcholine (GPC)                          | -0.938 | 0.99  | 0.344 | 0.060  | 0.024 | 0.013    |
| 22185 | N-acetylaspartate (NAA)                                 | 0.208  | 0.245 | 0.397 | 0.164  | 0.05  | 0.00113  |
| 35428 | tiglylcarnitine (C5:1-DC)                               | 0.381  | 0.489 | 0.436 | -0.040 | 0.018 | 0.029    |
| 33959 | N-acetyltryptophan                                      | 0.271  | 0.371 | 0.465 | 0.059  | 0.02  | 0.00359  |
| 47112 | etiocolanolone glucuronide<br>palmitoyl-oleoyl-glycerol | -0.269 | 0.368 | 0.465 | -0.102 | 0.04  | 0.011    |
| 54942 | (16:0/18:1)                                             | 0.216  | 0.299 | 0.469 | 0.092  | 0.044 | 0.038    |
| 35127 | pro-hydroxy-pro                                         | -0.165 | 0.236 | 0.485 | 0.079  | 0.024 | 0.000861 |
| 21127 | 1-palmitoylglycerol (16:0)                              | -0.215 | 0.351 | 0.539 | 0.058  | 0.027 | 0.034    |
| 36808 | dimethylarginine (SDMA +<br>ADMA)                       | 0.568  | 0.992 | 0.567 | 0.018  | 0.008 | 0.025    |
| 37211 | androstenediol (3beta,17beta)<br>monosulfate (1)        | 0.289  | 0.505 | 0.568 | -0.106 | 0.041 | 0.00876  |
| 33936 | octanoylcarnitine (C8)                                  | 0.058  | 0.107 | 0.592 | -0.068 | 0.029 | 0.018    |
| 1414  | 3-phosphoglycerate                                      | -0.197 | 0.37  | 0.595 | -0.108 | 0.051 | 0.033    |
| 19503 | stearoyl sphingomyelin<br>(d18:1/18:0)                  | 0.387  | 0.755 | 0.608 | -0.037 | 0.012 | 0.00226  |

[Type here]

|       |                                                         |        |       |       |        |       |          |
|-------|---------------------------------------------------------|--------|-------|-------|--------|-------|----------|
| 48491 | sphingomyelin (d18:1/20:1,<br>d18:2/20:0)               | -0.347 | 0.699 | 0.62  | -0.028 | 0.013 | 0.027    |
| 37186 | 5alpha-androstan-3alpha,17beta-<br>diol monosulfate (1) | 0.170  | 0.355 | 0.632 | -0.140 | 0.054 | 0.01     |
| 32425 | dehydroisoandrosterone sulfate<br>(DHEA-S)              | -0.293 | 0.691 | 0.672 | -0.091 | 0.034 | 0.00795  |
| 48885 | arabitol/xylitol                                        | -0.109 | 0.266 | 0.681 | 0.046  | 0.017 | 0.00645  |
| 48408 | tyramine O-sulfate                                      | -0.053 | 0.136 | 0.695 | 0.103  | 0.051 | 0.044    |
| 55001 | diacylglycerol (12:0/18:1,<br>14:0/16:1, 16:0/14:1)     | 0.035  | 0.091 | 0.701 | 0.156  | 0.071 | 0.028    |
| 1498  | N6,N6,N6-trimethyllysine                                | -0.101 | 0.313 | 0.748 | 0.046  | 0.022 | 0.039    |
| 37190 | 5alpha-androstan-3beta,17beta-<br>diol disulfate        | 0.180  | 0.624 | 0.773 | -0.097 | 0.049 | 0.046    |
| 45970 | 1-palmitoyl-GPG (16:0)                                  | 0.114  | 0.501 | 0.819 | 0.058  | 0.017 | 0.000912 |
| 22842 | cholate                                                 | 0.012  | 0.074 | 0.872 | 0.219  | 0.067 | 0.00116  |
| 37192 | 5alpha-androstan-3beta,17beta-<br>diol monosulfate (2)  | -0.063 | 0.555 | 0.91  | -0.129 | 0.048 | 0.00725  |
| 52431 | 1-palmitoleoylglycerol (16:1)                           | 0.017  | 0.169 | 0.919 | 0.108  | 0.038 | 0.00523  |
| 46957 | gulonate                                                | 0.022  | 0.255 | 0.931 | 0.124  | 0.048 | 0.011    |
| 1123  | inosine                                                 | -0.008 | 0.278 | 0.977 | 0.087  | 0.032 | 0.00634  |
| 52467 | 1-palmitoyl-2-arachidonoyl-GPI<br>(16:0/20:4)           | -0.004 | 0.222 | 0.987 | 0.114  | 0.026 | 8.97E-06 |

\*All were adjusted for age, sex, alcohol use, smoking, education, physical activity, and total calorie intake.

[Type here]

**Table S2. Metabolic pathways enrichment by SSB intake**

| <b>Sub Pathway</b>                                   | <b>Super Pathway</b> | <b>No. of metabolites assigned to the pathway</b> | <b>No. of significant metabolites in each pathway</b> | <b>Total No. of significant metabolites</b> | <b>Z score</b> | <b>P value</b>  |
|------------------------------------------------------|----------------------|---------------------------------------------------|-------------------------------------------------------|---------------------------------------------|----------------|-----------------|
| Phosphatidylcholine (PC)                             | Lipid                | 12                                                | 8                                                     | 86                                          | <b>4.109</b>   | <b>3.97E-05</b> |
| Phosphatidylinositol (PI)                            | Lipid                | 4                                                 | 4                                                     | 86                                          | <b>4.026</b>   | <b>5.68E-05</b> |
| Lysophospholipid (LPL)                               | Lipid                | 19                                                | 10                                                    | 86                                          | <b>3.649</b>   | <b>2.63E-04</b> |
| Fatty Acid Metabolism (Acyl Choline)                 | Lipid                | 3                                                 | 3                                                     | 86                                          | <b>3.482</b>   | <b>4.97E-04</b> |
| Androgenic Steroids                                  | Lipid                | 17                                                | 8                                                     | 86                                          | 2.857          | 4.28E-03        |
| Primary Bile Acid Metabolism                         | Lipid                | 8                                                 | 4                                                     | 86                                          | 2.149          | 3.16E-02        |
| Glutathione Metabolism                               | Amino Acid           | 3                                                 | 2                                                     | 86                                          | 2.033          | 4.21E-02        |
| Glycolysis, Gluconeogenesis, and Pyruvate Metabolism | Carbohydrate         | 3                                                 | 2                                                     | 86                                          | 2.033          | 4.21E-02        |
| Xanthine Metabolism                                  | Xenobiotics          | 14                                                | 0                                                     | 86                                          | -1.894         | 5.82E-02        |
| Long Chain Fatty Acid                                | Lipid                | 12                                                | 0                                                     | 86                                          | -1.750         | 8.02E-02        |
| Polyunsaturated Fatty Acid (n3 and n6)               | Lipid                | 12                                                | 0                                                     | 86                                          | -1.750         | 8.02E-02        |
| Methionine, Cysteine, SAM and Taurine Metabolism     | Amino Acid           | 11                                                | 0                                                     | 86                                          | -1.673         | 9.43E-02        |
| Fatty Acid, Dicarboxylate                            | Lipid                | 9                                                 | 0                                                     | 86                                          | -1.510         | 1.31E-01        |
| Glutamate Metabolism                                 | Amino Acid           | 9                                                 | 0                                                     | 86                                          | -1.510         | 1.31E-01        |
| Pyrimidine Metabolism, Uracil containing             | Nucleotide           | 6                                                 | 0                                                     | 86                                          | -1.228         | 2.19E-01        |
| Phosphatidylethanolamine (PE)                        | Lipid                | 6                                                 | 0                                                     | 86                                          | -1.228         | 2.19E-01        |

[Type here]

|                                              |                        |    |   |    |        |          |
|----------------------------------------------|------------------------|----|---|----|--------|----------|
| Leucine, Isoleucine and Valine Metabolism    | Amino Acid             | 20 | 2 | 86 | -1.135 | 2.56E-01 |
| Secondary Bile Acid Metabolism               | Lipid                  | 12 | 1 | 86 | -1.017 | 3.09E-01 |
| Progestin Steroids                           | Lipid                  | 4  | 0 | 86 | -1.001 | 3.17E-01 |
| Fructose, Mannose and Galactose Metabolism   | Carbohydrate           | 4  | 0 | 86 | -1.001 | 3.17E-01 |
| Lysoplasmalogen                              | Lipid                  | 4  | 0 | 86 | -1.001 | 3.17E-01 |
| Tryptophan Metabolism                        | Amino Acid             | 11 | 1 | 86 | -0.909 | 3.63E-01 |
| Nicotinate and Nicotinamide Metabolism       | Cofactors and Vitamins | 3  | 0 | 86 | -0.866 | 3.87E-01 |
| Purine Metabolism, Adenine containing        | Nucleotide             | 3  | 0 | 86 | -0.866 | 3.87E-01 |
| Medium Chain Fatty Acid                      | Lipid                  | 3  | 0 | 86 | -0.866 | 3.87E-01 |
| Acetylated Peptides                          | Peptide                | 3  | 0 | 86 | -0.866 | 3.87E-01 |
| Dihydrosphingomyelins                        | Lipid                  | 3  | 0 | 86 | -0.866 | 3.87E-01 |
| Tobacco Metabolite                           | Xenobiotics            | 3  | 0 | 86 | -0.866 | 3.87E-01 |
| Sphingomyelins                               | Lipid                  | 18 | 5 | 86 | 0.853  | 3.94E-01 |
| Fatty Acid, Monohydroxy                      | Lipid                  | 10 | 1 | 86 | -0.793 | 4.28E-01 |
| Plasmalogen                                  | Lipid                  | 10 | 1 | 86 | -0.793 | 4.28E-01 |
| Gamma-glutamyl Amino Acid                    | Peptide                | 10 | 1 | 86 | -0.793 | 4.28E-01 |
| Histidine Metabolism                         | Amino Acid             | 9  | 1 | 86 | -0.667 | 5.05E-01 |
| Ascorbate and Aldarate Metabolism            | Cofactors and Vitamins | 3  | 1 | 86 | 0.584  | 5.59E-01 |
| Phenylalanine Metabolism                     | Amino Acid             | 3  | 1 | 86 | 0.584  | 5.59E-01 |
| Fatty Acid Metabolism (also BCAA Metabolism) | Lipid                  | 3  | 1 | 86 | 0.584  | 5.59E-01 |
| Aminosugar Metabolism                        | Carbohydrate           | 3  | 1 | 86 | 0.584  | 5.59E-01 |

[Type here]

|                                                      |                        |    |   |    |        |          |
|------------------------------------------------------|------------------------|----|---|----|--------|----------|
| Sterol                                               | Lipid                  | 3  | 1 | 86 | 0.584  | 5.59E-01 |
| Dipeptide                                            | Peptide                | 3  | 1 | 86 | 0.584  | 5.59E-01 |
| Tyrosine Metabolism                                  | Amino Acid             | 14 | 2 | 86 | -0.535 | 5.93E-01 |
| Glycine, Serine and Threonine Metabolism             | Amino Acid             | 8  | 1 | 86 | -0.529 | 5.97E-01 |
| Benzoate Metabolism                                  | Xenobiotics            | 19 | 3 | 86 | -0.459 | 6.46E-01 |
| Urea cycle; Arginine and Proline Metabolism          | Amino Acid             | 12 | 3 | 86 | 0.448  | 6.54E-01 |
| Alanine and Aspartate Metabolism                     | Amino Acid             | 4  | 1 | 86 | 0.256  | 7.98E-01 |
| Pentose Metabolism                                   | Carbohydrate           | 4  | 1 | 86 | 0.256  | 7.98E-01 |
| Tocopherol Metabolism                                | Cofactors and Vitamins | 4  | 1 | 86 | 0.256  | 7.98E-01 |
| Purine Metabolism, (Hypo)Xanthine/Inosine containing | Nucleotide             | 6  | 1 | 86 | -0.200 | 8.42E-01 |
| TCA Cycle                                            | Energy                 | 6  | 1 | 86 | -0.200 | 8.42E-01 |
| Monoacylglycerol                                     | Lipid                  | 9  | 2 | 86 | 0.176  | 8.61E-01 |
| Lysine Metabolism                                    | Amino Acid             | 9  | 2 | 86 | 0.176  | 8.61E-01 |
| Fatty Acid Metabolism(Acyl Carnitine)                | Lipid                  | 16 | 3 | 86 | -0.118 | 9.06E-01 |
| Diacylglycerol                                       | Lipid                  | 15 | 3 | 86 | 0.009  | 9.93E-01 |
| Pregnenolone Steroids                                | Lipid                  | 5  | 1 | 86 | 0.005  | 9.96E-01 |
| Phospholipid Metabolism                              | Lipid                  | 5  | 1 | 86 | 0.005  | 9.96E-01 |

<sup>1</sup>Number of metabolites are the number of detected metabolites assigned to the respective pathway.

[Type here]

**Table S3. Metabolic pathways overpresented by BMI**

| <b>Sub Pathway</b>                       | <b>Super Pathway</b> | <b>No. of metabolites assigned to the pathway</b> | <b>No. of significant metabolites in each pathway</b> | <b>Total No. of significant metabolites</b> | <b>Z score</b> | <b>P value</b>  |
|------------------------------------------|----------------------|---------------------------------------------------|-------------------------------------------------------|---------------------------------------------|----------------|-----------------|
| Long Chain Fatty Acid                    | Lipid                | 12                                                | 10                                                    | 148                                         | <b>3.629</b>   | <b>2.85E-04</b> |
| Lysophospholipid                         | Lipid                | 19                                                | 13                                                    | 148                                         | 3.205          | 1.35E-03        |
| Sphingomyelins                           | Lipid                | 18                                                | 11                                                    | 148                                         | 2.449          | 1.43E-02        |
| Xanthine Metabolism                      | Xenobiotics          | 14                                                | 1                                                     | 148                                         | -              | 2.99E-02        |
| Glutamate Metabolism                     | Amino Acid           | 9                                                 | 6                                                     | 148                                         | 2.068          | 3.87E-02        |
| Phosphatidylethanolamine (PE)            | Lipid                | 6                                                 | 4                                                     | 148                                         | 1.682          | 9.25E-02        |
| Tyrosine Metabolism                      | Amino Acid           | 14                                                | 2                                                     | 148                                         | -              | 1.10E-01        |
| Monoacylglycerol                         | Lipid                | 9                                                 | 1                                                     | 148                                         | 1.477          | 1.40E-01        |
| Lysine Metabolism                        | Amino Acid           | 9                                                 | 5                                                     | 148                                         | 1.359          | 1.74E-01        |
| Aminosugar Metabolism                    | Carbohydrate         | 3                                                 | 2                                                     | 148                                         | 1.185          | 2.36E-01        |
| Glutathione Metabolism                   | Amino Acid           | 3                                                 | 2                                                     | 148                                         | 1.185          | 2.36E-01        |
| Sterol                                   | Lipid                | 3                                                 | 2                                                     | 148                                         | 1.185          | 2.36E-01        |
| Tobacco Metabolite                       | Xenobiotics          | 3                                                 | 2                                                     | 148                                         | 1.185          | 2.36E-01        |
| Polyunsaturated Fatty Acid (n3 and n6)   | Lipid                | 12                                                | 6                                                     | 148                                         | 1.164          | 2.44E-01        |
| Gamma-glutamyl Amino Acid                | Peptide              | 10                                                | 5                                                     | 148                                         | 1.060          | 2.89E-01        |
| Plasmalogen                              | Lipid                | 10                                                | 2                                                     | 148                                         | -              | 3.37E-01        |
| Pyrimidine Metabolism, Uracil containing | Nucleotide           | 6                                                 | 1                                                     | 148                                         | 0.913          | 3.61E-01        |

[Type here]

|                                                  |                        |    |   |     |       |          |          |
|--------------------------------------------------|------------------------|----|---|-----|-------|----------|----------|
| Fatty Acid, Dicarboxylate                        | Lipid                  | 9  | 2 | 148 | -     | 0.768    | 4.42E-01 |
| Phospholipid Metabolism                          | Lipid                  | 5  | 1 | 148 | -     | 0.675    | 5.00E-01 |
| Pregnenolone Steroids                            | Lipid                  | 5  | 1 | 148 | -     | 0.675    | 5.00E-01 |
| Alanine and Aspartate Metabolism                 | Amino Acid             | 4  | 2 | 148 | 0.666 | 5.06E-01 |          |
| Lysoplasmalogen                                  | Lipid                  | 4  | 2 | 148 | 0.666 | 5.06E-01 |          |
| Tocopherol Metabolism                            | Cofactors and Vitamins | 4  | 2 | 148 | 0.666 | 5.06E-01 |          |
| Histidine Metabolism                             | Amino Acid             | 9  | 4 | 148 | 0.650 | 5.16E-01 |          |
| Glycine, Serine and Threonine Metabolism         | Amino Acid             | 8  | 2 | 148 | -     | 0.556    | 5.78E-01 |
| Phosphatidylcholine (PC)                         | Lipid                  | 12 | 5 | 148 | 0.548 | 5.84E-01 |          |
| Urea cycle; Arginine and Proline Metabolism      | Amino Acid             | 12 | 5 | 148 | 0.548 | 5.84E-01 |          |
| Methionine, Cysteine, SAM and Taurine Metabolism | Amino Acid             | 11 | 3 | 148 | -     | 0.494    | 6.21E-01 |
| Tryptophan Metabolism                            | Amino Acid             | 11 | 3 | 148 | -     | 0.494    | 6.21E-01 |
| Fructose, Mannose and Galactose Metabolism       | Carbohydrate           | 4  | 1 | 148 | -     | 0.392    | 6.95E-01 |
| Pentose Metabolism                               | Carbohydrate           | 4  | 1 | 148 | -     | 0.392    | 6.95E-01 |
| Fatty Acid, Monohydroxy                          | Lipid                  | 10 | 4 | 148 | 0.387 | 6.99E-01 |          |
| Fatty Acid Metabolism(Acyl Carnitine)            | Lipid                  | 16 | 5 | 148 | -     | 0.258    | 7.96E-01 |
| Benzoate Metabolism                              | Xenobiotics            | 19 | 7 | 148 | 0.242 | 8.09E-01 |          |

[Type here]

|                                                      |                        |    |   |     |       |          |
|------------------------------------------------------|------------------------|----|---|-----|-------|----------|
| Leucine, Isoleucine and Valine Metabolism            | Amino Acid             | 20 | 7 | 148 | 0.071 | 9.43E-01 |
| Secondary Bile Acid Metabolism                       | Lipid                  | 12 | 4 | 148 | -     | 9.45E-01 |
| Purine Metabolism, (Hypo)Xanthine/Inosine containing | Nucleotide             | 6  | 2 | 148 | -     | 9.62E-01 |
| TCA Cycle                                            | Energy                 | 6  | 2 | 148 | 0.048 | 9.62E-01 |
| Acetylated Peptides                                  | Peptide                | 3  | 1 | 148 | -     | 9.73E-01 |
| Dipeptide                                            | Peptide                | 3  | 1 | 148 | 0.034 | 9.73E-01 |
| Fatty Acid Metabolism (also BCAA Metabolism)         | Lipid                  | 3  | 1 | 148 | -     | 9.73E-01 |
| Glycolysis, Gluconeogenesis, and Pyruvate Metabolism | Carbohydrate           | 3  | 1 | 148 | 0.034 | 9.73E-01 |
| Medium Chain Fatty Acid                              | Lipid                  | 3  | 1 | 148 | -     | 9.73E-01 |
| Nicotinate and Nicotinamide Metabolism               | Cofactors and Vitamins | 3  | 1 | 148 | 0.034 | 9.73E-01 |
| Phenylalanine Metabolism                             | Amino Acid             | 3  | 1 | 148 | -     | 9.73E-01 |
| Purine Metabolism, Adenine containing                | Nucleotide             | 3  | 1 | 148 | 0.034 | 9.73E-01 |
| Androgenic Steroids                                  | Lipid                  | 17 | 0 | 148 | -     | 2.42E-03 |
| Ascorbate and Aldarate Metabolism                    | Cofactors and Vitamins | 3  | 0 | 148 | 3.033 | 2.10E-01 |
| Diacylglycerol                                       | Lipid                  | 15 | 0 | 148 | -     | 4.48E-03 |



[Type here]

|                                      |       |   |   |     |   |       |          |
|--------------------------------------|-------|---|---|-----|---|-------|----------|
| Dihydrosphingomyelins                | Lipid | 3 | 0 | 148 | - | 1.253 | 2.10E-01 |
| Fatty Acid Metabolism (Acyl Choline) | Lipid | 3 | 0 | 148 | - | 1.253 | 2.10E-01 |
| Phosphatidylinositol (PI)            | Lipid | 4 | 0 | 148 | - | 1.449 | 1.47E-01 |
| Primary Bile Acid Metabolism         | Lipid | 8 | 0 | 148 | - | 2.059 | 3.95E-02 |
| Progestin Steroids                   | Lipid | 4 | 0 | 148 | - | 1.449 | 1.47E-01 |

---

<sup>1</sup>Number of metabolites are the number of detected metabolites assigned to the respective pathway.

[Type here]

**Table S4. Pathway enrichment analysis for common metabolites that are associated with both SSB intake and BMI**

| <b>Sub Pathway</b>                                   | <b>Super Pathway</b>   | <b>No. of metabolites assigned to the pathway</b> | <b>No. of significant metabolites in each pathway</b> | <b>Total No. of significant metabolites</b> | <b>Z score</b> | <b>P value</b>  |
|------------------------------------------------------|------------------------|---------------------------------------------------|-------------------------------------------------------|---------------------------------------------|----------------|-----------------|
| Lysophospholipid (LPL)                               | Lipid                  | 19                                                | 6                                                     | 28                                          | <b>4.539</b>   | <b>5.65E-06</b> |
| Phosphatidylcholine (PC)                             | Lipid                  | 12                                                | 4                                                     | 28                                          | <b>3.827</b>   | <b>1.30E-04</b> |
| Aminosugar Metabolism                                | Carbohydrate           | 3                                                 | 1                                                     | 28                                          | 1.893          | 0.0583          |
| Fatty Acid Metabolism (also BCAA Metabolism)         | Lipid                  | 3                                                 | 1                                                     | 28                                          | 1.893          | 0.0583          |
| Glutathione Metabolism                               | Amino Acid             | 3                                                 | 1                                                     | 28                                          | 1.893          | 0.0583          |
| Glycolysis, Gluconeogenesis, and Pyruvate Metabolism | Carbohydrate           | 3                                                 | 1                                                     | 28                                          | 1.893          | 0.0583          |
| Sterol                                               | Lipid                  | 3                                                 | 1                                                     | 28                                          | 1.893          | 0.0583          |
| Tocopherol Metabolism                                | Cofactors and Vitamins | 4                                                 | 1                                                     | 28                                          | 1.510          | 0.1311          |
| Leucine, Isoleucine and Valine Metabolism            | Amino Acid             | 20                                                | 0                                                     | 28                                          | -1.204         | 0.2285          |
| Benzoate Metabolism                                  | Xenobiotics            | 19                                                | 0                                                     | 28                                          | -1.172         | 0.2411          |
| Sphingomyelins                                       | Lipid                  | 18                                                | 0                                                     | 28                                          | -1.140         | 0.2544          |
| Androgenic Steroids                                  | Lipid                  | 17                                                | 0                                                     | 28                                          | -1.106         | 0.2686          |
| Fatty Acid Metabolism(Acyl Carnitine)                | Lipid                  | 16                                                | 0                                                     | 28                                          | -1.072         | 0.2838          |
| Diacylglycerol                                       | Lipid                  | 15                                                | 0                                                     | 28                                          | -1.037         | 0.2999          |
| TCA Cycle                                            | Energy                 | 6                                                 | 1                                                     | 28                                          | 1.019          | 0.3081          |
| Tyrosine Metabolism                                  | Amino Acid             | 14                                                | 0                                                     | 28                                          | -1.000         | 0.3172          |
| Xanthine Metabolism                                  | Xenobiotics            | 14                                                | 0                                                     | 28                                          | -1.000         | 0.3172          |
| Long Chain Fatty Acid                                | Lipid                  | 12                                                | 0                                                     | 28                                          | -0.924         | 0.3556          |

[Type here]

|                                                      |              |    |   |    |        |        |
|------------------------------------------------------|--------------|----|---|----|--------|--------|
| Polyunsaturated Fatty Acid (n3 and n6)               | Lipid        | 12 | 0 | 28 | -0.924 | 0.3556 |
| Secondary Bile Acid Metabolism                       | Lipid        | 12 | 0 | 28 | -0.924 | 0.3556 |
| Urea cycle; Arginine and Proline Metabolism          | Amino Acid   | 12 | 0 | 28 | -0.924 | 0.3556 |
| Methionine, Cysteine, SAM and Taurine Metabolism     | Amino Acid   | 11 | 0 | 28 | -0.883 | 0.3770 |
| Tryptophan Metabolism                                | Amino Acid   | 11 | 0 | 28 | -0.883 | 0.3770 |
| Fatty Acid, Monohydroxy                              | Lipid        | 10 | 0 | 28 | -0.841 | 0.4002 |
| Gamma-glutamyl Amino Acid                            | Peptide      | 10 | 0 | 28 | -0.841 | 0.4002 |
| Plasmalogen                                          | Lipid        | 10 | 0 | 28 | -0.841 | 0.4002 |
| Fatty Acid, Dicarboxylate                            | Lipid        | 9  | 0 | 28 | -0.797 | 0.4253 |
| Glutamate Metabolism                                 | Amino Acid   | 9  | 0 | 28 | -0.797 | 0.4253 |
| Histidine Metabolism                                 | Amino Acid   | 9  | 0 | 28 | -0.797 | 0.4253 |
| Lysine Metabolism                                    | Amino Acid   | 9  | 0 | 28 | -0.797 | 0.4253 |
| Monoacylglycerol                                     | Lipid        | 9  | 0 | 28 | -0.797 | 0.4253 |
| Glycine, Serine and Threonine Metabolism             | Amino Acid   | 8  | 0 | 28 | -0.751 | 0.4528 |
| Primary Bile Acid Metabolism                         | Lipid        | 8  | 0 | 28 | -0.751 | 0.4528 |
| Phosphatidylethanolamine (PE)                        | Lipid        | 6  | 0 | 28 | -0.649 | 0.5166 |
| Purine Metabolism, (Hypo)Xanthine/Inosine containing | Nucleotide   | 6  | 0 | 28 | -0.649 | 0.5166 |
| Pyrimidine Metabolism, Uracil containing             | Nucleotide   | 6  | 0 | 28 | -0.649 | 0.5166 |
| Phospholipid Metabolism                              | Lipid        | 5  | 0 | 28 | -0.591 | 0.5542 |
| Pregnenolone Steroids                                | Lipid        | 5  | 0 | 28 | -0.591 | 0.5542 |
| Alanine and Aspartate Metabolism                     | Amino Acid   | 4  | 0 | 28 | -0.528 | 0.5972 |
| Fructose, Mannose and Galactose Metabolism           | Carbohydrate | 4  | 0 | 28 | -0.528 | 0.5972 |

[Type here]

|                                        |                        |   |   |    |        |        |
|----------------------------------------|------------------------|---|---|----|--------|--------|
| Lysoplasmalogen                        | Lipid                  | 4 | 0 | 28 | -0.528 | 0.5972 |
| Pentose Metabolism                     | Carbohydrate           | 4 | 0 | 28 | -0.528 | 0.5972 |
| Phosphatidylinositol (PI)              | Lipid                  | 4 | 0 | 28 | -0.528 | 0.5972 |
| Progestin Steroids                     | Lipid                  | 4 | 0 | 28 | -0.528 | 0.5972 |
| Acetylated Peptides                    | Peptide                | 3 | 0 | 28 | -0.457 | 0.6476 |
| Ascorbate and Aldarate Metabolism      | Cofactors and Vitamins | 3 | 0 | 28 | -0.457 | 0.6476 |
| Dihydrosphingomyelins                  | Lipid                  | 3 | 0 | 28 | -0.457 | 0.6476 |
| Dipeptide                              | Peptide                | 3 | 0 | 28 | -0.457 | 0.6476 |
| Fatty Acid Metabolism (Acyl Choline)   | Lipid                  | 3 | 0 | 28 | -0.457 | 0.6476 |
| Medium Chain Fatty Acid                | Lipid                  | 3 | 0 | 28 | -0.457 | 0.6476 |
| Nicotinate and Nicotinamide Metabolism | Cofactors and Vitamins | 3 | 0 | 28 | -0.457 | 0.6476 |
| Phenylalanine Metabolism               | Amino Acid             | 3 | 0 | 28 | -0.457 | 0.6476 |
| Purine Metabolism, Adenine containing  | Nucleotide             | 3 | 0 | 28 | -0.457 | 0.6476 |
| Tobacco Metabolite                     | Xenobiotics            | 3 | 0 | 28 | -0.457 | 0.6476 |

<sup>1</sup>Number of metabolites are the number of detected metabolites assigned to the respective pathway.
